# Supplementary material for: Tubular organotypic culture model of human kidney
Source: PubMed Central journal article supplement (PMC6209336; doi:10.1371/journal.pone.0206447), 2018-10-31

**A****Organoid whole stain**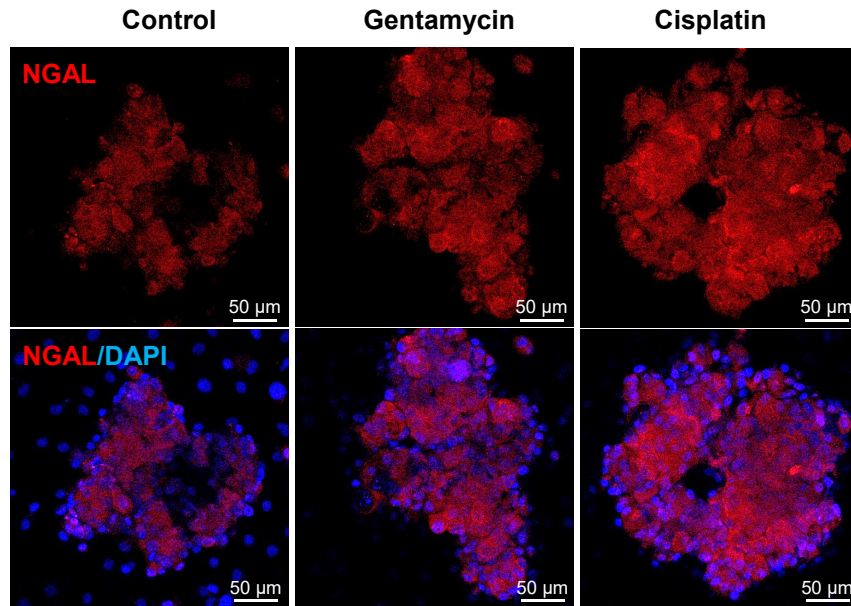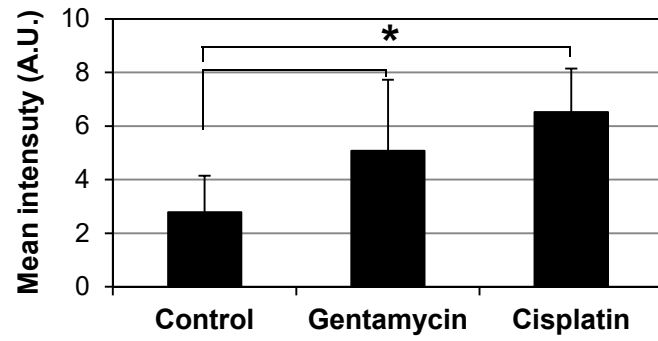**B****Sectioned organoid stain**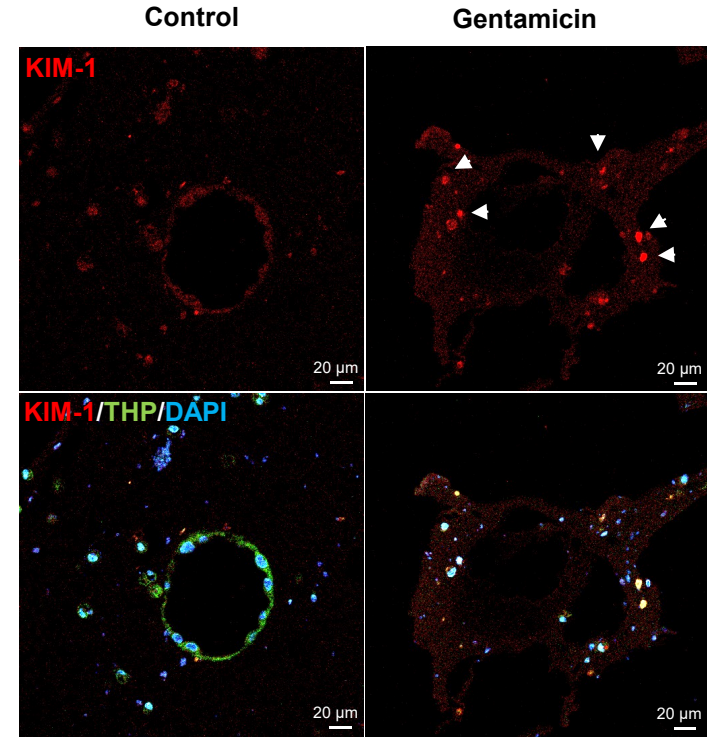

Supplement: pone.0206447.s001.pdf [file pone.0206447.s001.pdf]
